# Supplementary material for: Investigating the clinical role and prognostic value of genes related to insulin-like growth factor signaling pathway in thyroid cancer
Source: publisher site journal article supplement (doi:10.18632/aging.205524), 2024-02-07
Supplement: Supplementary file [file aging-v16i3-205524-supplementary-material-SD1.pdf]

## SUPPLEMENTARY TABLE

**Supplementary Table 1.**  
**The list of 40 IGF-related genes is showed in.**

---

CSNK2A1  
ELK1  
FOS  
GRB2  
HRAS  
IGF1  
IGF1R  
IRS1  
JUN  
MAP2K1  
MAPK3  
MAPK8  
PIK3CA  
PIK3CG  
PIK3R1  
PTPN11  
RAF1  
RASA1  
SHC1  
SOS1  
SRF  
AKT1  
BAD  
BCAR1  
CRK  
CRKL  
GRB10  
IRS2  
NCK2  
PDPK1  
PRKCD  
PRKCZ  
PRKD1  
PTK2  
PTPN1  
PXN  
RACK1  
RPS6KB1  
YWHAE  
YWHAZ

---
